# Supplementary material for: Gelation of an amino acid ionic liquid by the addition of a phosphonium-type zwitterion
Source: Royal Society of Chemistry journal article supplement (doi:10.1039/c1cc14455c), 2011-01-01
Supplement: c1cc14455c.pdf [file c1cc14455c.pdf]

## Electronic Supplementary Information

Gelation of an amino acid ionic liquid by the addition of a phosphonium-type zwitterion

Satomi Taguchi, Takuro Matsumoto, Takahiro Ichikawa, Takashi Kato, and Hiroyuki Ohno\*

### Preparation of zwitterion, ionic liquid, and their mixtures

**ZI:** 1-(Trioctylphosphonio)butane-4-sulfonate was obtained by refluxing trioctylphosphine with 1,4-butanediol in toluene at 140 °C for 36 h. After toluene was evaporated, the product was purified with diethyl ether three times. The crude compound was further purified by the recrystallization from ethyl acetate/ethanol mixture. The resultant product was obtained as a white powder in 77% yield.

$^1\text{H}$  NMR( $\text{CDCl}_3$ , 400MHz):  $\delta_{\text{H}} = 0.88$  (9H, t,  $J = 13.76$  Hz), 1.26 (24H, m,  $J = 31.92$  Hz), 1.48 (12H, m,  $J = 4.12$  Hz), 1.75 (2H, m,  $J = 31.16$  Hz), 2.01 (2H, t,  $J = 29.32$  Hz), 2.21 (6H, m,  $J = 28.44$  Hz), 2.47 (2H, m,  $J = 30.24$  Hz), 2.87 (2H, t,  $J = 14.68$  Hz).  $^{13}\text{C}$  NMR ( $\text{CDCl}_3$ , 100 MHz):  $\delta_{\text{C}} = 13.99, 18.52, 18.99, 20.65, 21.73, 22.51, 26.59, 26.75, 28.88, 30.65, 30.78, 31.62, 50.10$ .

Elemental analysis for  $\text{C}_{28}\text{H}_{59}\text{O}_3\text{PS}$  calcd: C, 66.36; H, 11.73; N, 0; O, 9.47; P, 6.11; S, 6.33. Found: C, 66.32; H, 12.06; N, 0.

**[emim][Leu]:** 1-Ethyl-3-methylimidazolium leucine was synthesised as reported previously. The [emim][Leu] was prepared by neutralisation of amino acid with 1-ethyl-3-methyl imidazolium hydroxide in dilute aqueous solution.<sup>1</sup>

Mixtures of ZI and [emim][Leu] were prepared by slow evaporation of the methanol solution of ZI and [emim][Leu], and the obtained mixtures were further dried at 60 °C under vacuum for 24 h.

### Measurement

Both  $^1\text{H}$  and  $^{13}\text{C}$  NMR spectra were recorded on a JEOL 400 spectrometer. Mixtures were loaded under a dry  $\text{N}_2$  atmosphere into the internal chamber of a NMR coaxial capillary. The internal chamber was sealed by gas burner. The internal tube inserted a solution of  $\text{DMSO}-d_6$  in the external chamber. The insert was sealed by gas burner. DSC measurements were performed on a DSC6220 (SEIKO Instrument Inc.) at a scanning rate of  $5\text{ }^\circ\text{C min}^{-1}$ . X ray diffraction measurements were performed on a Smart Lab (Rigaku). Samples were loaded into 1 mm capillaries and sealed by gas burner to prevent water absorption. Ionic conductivity was measured by the AC impedance method

using a Schlumberger Solartron 1260 impedance/gain-phase analyzer. The impedance of the samples was measured from 10 Hz to 1 MHz with temperature scanning at  $2\text{ }^{\circ}\text{C min}^{-1}$  from 30 to  $110\text{ }^{\circ}\text{C}$ .

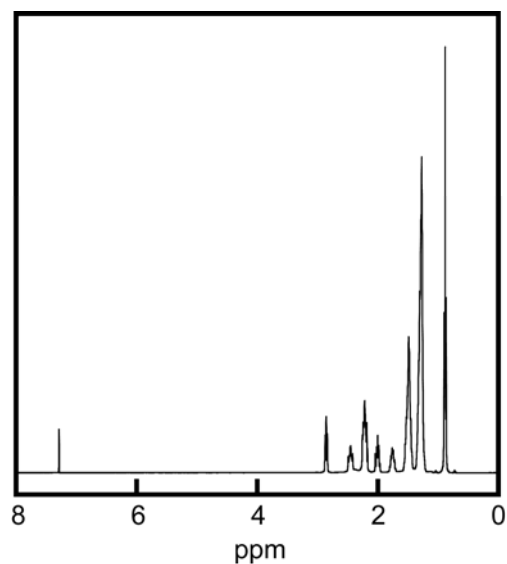

Fig. S1  $^1\text{H}$  NMR spectrum of ZI.

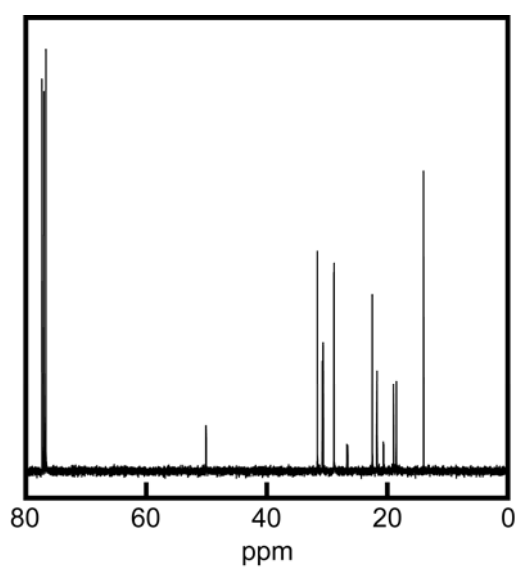

Fig. S2  $^{13}\text{C}$  NMR spectrum of ZI.

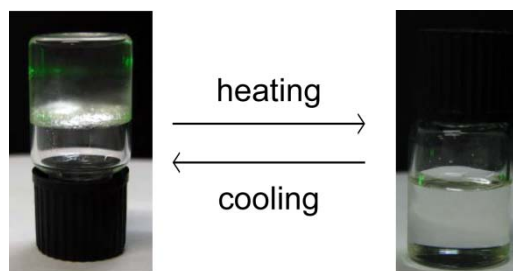

**Fig. S3** Photograph of the Tyndall phenomenon for ZI/[emim][Leu] (1:3) mixture with green laser (532nm).

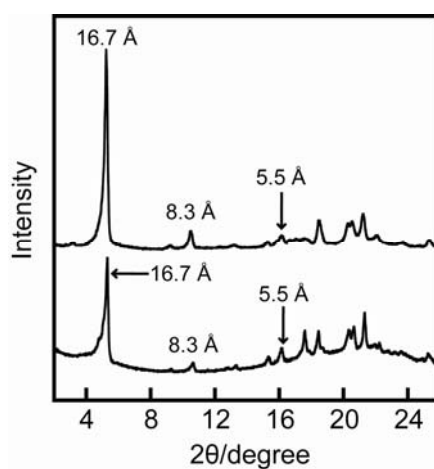

**Fig. S4** X-ray diffraction patterns for: (a) ZI alone and (b) the ZI/[emim][Leu] (1:3) mixture at 25 °C.

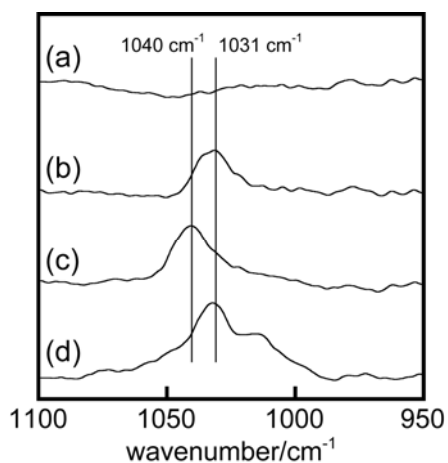

**Fig. S5** IR spectra of ZI and [emim][Leu] mixture at room temperature. (a) [emim][Leu], (b) ZI/[emim][Leu] (1:1) mixture, (c) ZI, (d) imidazolium type zwitterion (1-methyl-3-(3-sulfopropyl)-imidazolium betaine).

**Table 1** VFT parameters for ZI and ZI/[emim][Leu] mixture (1:3)

| compound             | T <sub>0</sub> (K) | A(S/cm) | B(K) | E <sub>a</sub> (keV) <sup>a</sup> | R <sup>2</sup> |
|----------------------|--------------------|---------|------|-----------------------------------|----------------|
| ZI                   | 209                | 2.688   | 657  | 5.37                              | 0.9995         |
| ZI/[emim][Leu] (1:3) | 198                | 0.516   | 654  | 5.34                              | 0.9990         |

A: carrier ion number, B: activation energy <sup>a</sup> E<sub>a</sub> = B/0 8.1674 (10<sup>5</sup> eV)

#### Reference

<sup>1</sup> K. Fukumoto, M. Yoshizawa and H. Ohno, *J. Am. Chem. Soc.*, 2005, **127**, 2398.
